# Supplementary material for: Effects of physical exercise during pregnancy on mothers’ and neonates’ health: a protocol for an umbrella review of systematic reviews and meta-analysis of randomised controlled trials
Source: PubMed Central journal article supplement — BMJ Open. 2019 Sep 13;9(9):e030162. doi: 10.1136/bmjopen-2019-030162 (PMC6747876; doi:10.1136/bmjopen-2019-030162), 2019-09-13
Supplement: bmjopen-2019-030162supp001.pdf [file bmjopen-2019-030162supp001.pdf]

**Additional file 1:** Data extraction form for systematic reviews and meta-analyses

| Items                                                                                 | Extracted data |
|---------------------------------------------------------------------------------------|----------------|
| Reviewer                                                                              |                |
| First Author and<br>Publication year                                                  |                |
| Review title                                                                          |                |
| Year range considered for<br>inclusion                                                |                |
| Journal name                                                                          |                |
| Last search date                                                                      |                |
| Region/state/country                                                                  |                |
| Source of funding                                                                     |                |
| Aim/objectives of the<br>study                                                        |                |
| Protocol registered                                                                   |                |
| Database searched                                                                     |                |
| Number of articles<br>included                                                        |                |
| Number of articles<br>included in meta-analysis                                       |                |
| Participant characteristics<br>(age, number of<br>participants, parity,<br>subgroups) |                |
| Type of exercise                                                                      |                |
| Intensity of exercise                                                                 |                |
| Duration of intervention                                                              |                |
| Main Outcome variable                                                                 |                |
| Total Sample size                                                                     |                |
| Quality assessment tool<br>and source                                                 |                |
| Cochrane Collaboration<br>reviews Vs not                                              |                |

| Items                                                                                                  | Extracted data |
|--------------------------------------------------------------------------------------------------------|----------------|
| Type of analysis used in review                                                                        |                |
| Pooled effect                                                                                          |                |
| Findings                                                                                               |                |
| Adverse Events                                                                                         |                |
| Sub-group analysis/sensitivity test criteria and findings                                              |                |
| Overall quality of included studies AMSTAR-2                                                           |                |
| Quality of the evidence GRADE                                                                          |                |
| Reported heterogeneity of the studies, I <sup>2</sup>                                                  |                |
| Reporting guideline used (PRISMA)                                                                      |                |
| Key conclusions of study authors: Further study information requested                                  |                |
| Reviewers comments on methodology, limitations, generalisability that you have after reading the paper |                |
| Reported publication bias                                                                              |                |
