# Supplementary material for: Effects of physical exercise during pregnancy on mothers’ and neonates’ health: a protocol for an umbrella review of systematic reviews and meta-analysis of randomised controlled trials
Source: PubMed Central journal article supplement — BMJ Open. 2019 Sep 13;9(9):e030162. doi: 10.1136/bmjopen-2019-030162 (PMC6747876; doi:10.1136/bmjopen-2019-030162), 2019-09-13
Supplement: bmjopen-2019-030162supp002.pdf [file bmjopen-2019-030162supp002.pdf]

**Additional file 2:** Data extraction form for included randomized controlled trials.

| Items                                        | Extracted data |
|----------------------------------------------|----------------|
| Reviewer                                     |                |
| First Author and Publication year            |                |
| RCT title                                    |                |
| Setting                                      |                |
| Intervention Group Sample                    |                |
| Control Group Sample                         |                |
| Participant characteristics (parity, BMI)    |                |
| Protocol registered                          |                |
| Intervention Characteristics                 |                |
| Type of exercise                             |                |
| Duration (weeks)                             |                |
| Frequency (sessions per week)                |                |
| Session duration (min)                       |                |
| Intensity of exercise                        |                |
| Main Outcome variables                       |                |
| Pooled effect                                |                |
| Findings                                     |                |
| Adverse Events                               |                |
| Risk of bias (Cochrane collaboration's tool) |                |
| Sequence generation                          |                |
| Allocation concealment                       |                |
| Blinding of personnel and participants       |                |
| Blinding of outcome assessment               |                |
| Incomplete outcome data                      |                |
| Selective outcome reporting                  |                |
| Others                                       |                |
